# Supplementary material for: Retrospective study of a novel hematological parameter for predicting the survival of patients with nasopharyngeal carcinoma
Source: PeerJ. 2024 Jun 21;12:e17573. doi: 10.7717/peerj.17573 (PMC11195549; doi:10.7717/peerj.17573)
Supplement: Supplemental Information 1 [file peerj-12-17573-s001.xlsx]

## Sheet: Sheet1
DFS time	gender	year	OS time	T	N	M	Stage	WBC	Neutrophil	lymphocyte	Monocyte	Eosnophils	Basophil	Platelet	HB	ALB	GLO
60	male	31	60	2	3	0	IVb	7.56	4.42	2.39	0.64	0.1	0.02	266	158	44.7	27.1
33	female	61	60	4	3	0	IVb	4.07	2.16	1.44	0.36	0.06	0.05	343	129	41	41.1
60	female	47	60	4	1	0	IVa	8.18	5.94	1.5	0.49	0.21	0.04	221	126	41.2	32.1
	female	39		4	3	0	IVb	4.44	2.34	1.46	0.49	0.13	0.02	232	110	36.7	38.4
60	female	47	60	4	0	0	IVa	4.22	1.95	1.87	0.36	0.03	0.01	283	125	39.8	33.2
60	female	51	60	4	0	0	IVa	13.94	9.77	2.79	1.33	0.05	0	279	141	39.2	33.5
32	female	53	32	4	2	0	IVa	5.87	2.88	2.29	0.36	0.31	0.04	334	132	40.6	36
36	male	71	36	4	0	0	IVa	5.62	3.28	1.6	0.69	0.04	0.01	231	136	42	30.1
60	female	44	60	4	1	0	IVa	7.47	4.74	2.06	0.4	0.21	0.06	248	138	42.2	36.9
60	male	44	60	4	1	0	IVa	4.45	2.77	1.42	0.21	0.03	0.02	259	154	44.9	28.7
60	female	54	60	4	0	0	IVa	6.04	4.72	0.97	0.3	0.04	0.01	158	136	45.9	26.4
60	female	57	60	4	2	0	IVa	4.18	2.42	1.42	0.24	0.07	0.03	169	116	40.4	30.6
20	male	48	20	4	2	0	IVa	6.4	4.03	1.78	0.54	0.04	0.01	293	131	38.2	35.9
60	male	57	60	4	1	0	IVa	7.07	4.49	1.6	0.8	0.17	0.01	181	147	42.6	29.2
3	female	43	3	4	2	0	IVa	6.29	4.65	1.35	0.17	0.1	0.01	374	87.5	30.4	41.3
60	female	49	60	4	3	0	IVb	6.59	4.73	1.16	0.57	0.11	0.01	167	126	34.6	29.3
60	male	46	60	4	1	0	IVa	8.33	5.4	2.16	0.68	0.07	0.02	225	160	46.2	30.1
60	male	56	60	4	1	0	IVa	0.93	0.61	0.21	0.06	0.05	0	10	108	40.9	28.8
	male	58		4	1	0	IVa	6.89	3.11	3.17	0.49	0.06	0.06	356	149	42.2	41.8
60	male	46	60	4	1	0	IVa	4.27	3.5	0.43	0.33	0.2	0	191	110	44	37.7
44	male	38	60	4	2	0	IVa	6.9	4.28	1.85	0.57	0.13	0.07	359	146	40.3	27.3
60	male	59	60	4	0	0	IVa	9.62	6.3	2.19	0.73	0.38	0.02	263	145	39.2	37.6
5	male	62	5	4	2	0	IVa	4.3	2.36	1.41	0.43	0.07	0.03	195	141	39	31.9
5	female	55	5	4	2	0	IVa	4.44	2.61	1.35	0.42	0.05	0.01	271	118	38	49.4
60	female	38	60	4	0	0	IVa	7.97	5.89	1.49	0.554	0.03	0.02	236	106	43.1	26.4
60	male	44	60	4	0	0	IVa	4.67	3.1	1.33	0.17	0.14	0.02	216	141	44.2	31.1
60	male	55	60	4	3	0	IVb	2.7	1.57	0.77	0.3	0.05	0.01	262	109	33.7	35.3
17	male	35	17	4	1	0	IVa	7.2	5.53	1.11	0.41	0.13	0.02	277	151	46.9	35.4
60	male	53	60	4	2	0	IVa	9.2	7.45	0.96	0.64	0.12	0.03	214	99.1	36.1	27.8
36	male	71	36	4	0	0	IVa	7.01	3.61	2.79	0.43	0.14	0.03	141	136	37.2	32.4
60	male	42	60	4	1	0	IVa	6.72	4.61	1.57	0.44	0.09	0.01	262	147	40.5	31.8
60	male	43	60	4	2	0	IVa	7.86	4.67	2.6	0.57	0.01	0.01	227	134	34.5	24.6
60	male	55	60	4	2	0	IVa	4.94	2.4	1.97	0.33	0.23	0.01	207	162	47.6	35.5
60	male	59	60	4	1	0	IVa	3.68	2.23	1	0.37	0.06	0.02	107	146	38.4	25.6
60	male	50	60	4	2	0	IVa	5.99	3.82	1.61	0.44	0.1	0.03	233	139	37.6	29.9
60	male	33	60	4	2	0	IVa	6.86	4.19	1.9	0.48	0.27	0.02	218	150	45.3	30.2
60	female	20	60	4	2	0	IVa	7.72	4.44	2.47	0.41	0.38	0.02	263	123	42.3	35.6
60	male	53	60	4	2	0	IVa	6.37	4.06	1.64	0.62	0.04	0.01	170	137	40.3	30
60	male	51	60	4	2	0	IVa	9.14	6.22	2.2	0.44	0.24	0.04	214	150	39.8	34.7
60	male	42	60	4	2	0	IVa	4.58	3.82	0.63	0.11	0.01	0.01	181	137	42	33
60	male	49	60	4	3	0	IVb	6.77	4.81	1.28	0.47	0.19	0.01	248	147	49	33.2
7	male	51	60	4	2	0	IVa	9.3	5.42	3.07	0.56	0.19	0.07	233	158	44	36.8
11	male	43	11	4	3	0	IVb	4.65	2.9	1.38	0.26	0.03	0.08	223	139	48.7	27.9
60	male	49	60	4	3	0	IVb	9.56	6.62	2.12	0.53	0.27	0.02	255	156	40.2	28.7
46	male	52	46	4	2	0	IVa	4.31	2.9	1.08	0.23	0.05	0.04	124	161	50.9	36.4
60	male	22	60	4	0	0	IVa	2.42	0.69	1.43	0.19	0.04	0.07	229	126	37.6	34.4
44	male	43		4	0	0	IVa	10.44	6.85	2.55	0.94	0.09	0.01	251	159	41	24.8
60	male	56	60	4	2	0	IVa	4.88	2.18	1.97	0.44	0.25	0.04	192	132	38.2	27
60	male	42	60	4	2	0	IVa	5.27	3.29	1.14	0.52	0.29	0.03	182	135	36.4	29.9
5	male	72	5	4	2	0	IVa	5.43	3.19	1.51	0.65	0.8	0.03	143	120	34.1	40.3
60	female	49	60	4	0	0	IVa	6.72	4.02	2.11	0.52	0.9	0.1	223	132	41.9	35.8
60	female	46	60	4	1	0	IVa	7.45	5.04	1.78	0.47	0.15	0.01	198	155	44.6	36
60	female	59	60	4	2	0	IVa	6.53	4.03	1.97	0.36	0.13	0.04	220	130	37.6	35.4
60	male	44	60	3	0	0	III	7	3.88	2.43	0.58	0.09	0.02	278	150	37.6	41
60	female	50	60	3	2	0	III	5.16	2.84	1.68	0.44	0.19	0.01	163	133	39.3	34.4
60	female	45	60	3	1	0	III	7.46	4.72	2.01	0.6	0.3	0.02	295	131	42.5	35.6
60	female	46	60	3	0	0	III	4.96	2.35	2.23	0.25	0.08	0.05	291	143	51.7	30.1
60	male	57	60	3	2	0	III	5.23	3.54	1.05	0.45	0.16	0.02	178	138	38	35.2
5	male	57		3	3	0	IVb	7.84	4.79	2.52	0.39	0.1	0.04	342	119	38.3	31
60	female	43	60	3	1	0	III	6.84	4.44	1.46	0.62	0.27	0.05	247	146	44.7	32.4
60	female	37	60	3	2	0	III	8.04	6.13	1.36	0.45	0.07	0.03	150	129	45.8	30.6
60	female	23	60	3	2	0	III	3.52	1.88	1.3	0.25	0.09	0.01	159	108	31.1	29.8
60	female	29	60	3	2	0	III	4.27	3.02	0.96	0.23	0.04	0.01	148	109	38.7	37.5
60	male	51	60	3	1	0	III	7.83	4.32	2.8	0.51	0.18	0.03	285	154	42.2	34.8
60	male	65	60	3	1	0	III	7.44	5.45	1.54	0.35	0.09	0.01	236	162	43	35
60	male	65	60	3	3	0	IVb	6.42	4.34	1.24	0.73	0.11	0	248	126	33.2	46.1
60	male	46	60	3	1	0	III	5.04	3.36	1.29	0.26	0.11	0.01	178	144	41.8	23.6
60	female	38	60	3	1	0	III	6.2	4.38	1.37	0.39	0.06	0	179	131	40	29
60	male	54	60	3	2	0	III	5.2	2.74	1.43	0.81	0.2	0.02	186	154	43.2	26
26	female	43	26	3	3	0	IVb	5.32	3.48	1.41	0.35	0.06	0.01	208	120	38.8	31.3
60	female	46	60	3	2	0	III	5.6	3.54	1.72	0.27	0.05	0.02	242	129	50.1	31.7
60	male	40	60	3	2	0	III	6.51	4.05	2.04	0.33	0.08	0.01	214	153	41.7	29.8
11	male	57	11	3	3	0	IVb	4	2.56	1.16	0.17	0.09	0.02	114	136	47.2	31.3
48	male	45	48	3	2	0	III	5.59	3.79	1.41	0.3	0.08	0.01	146	167	46.6	32.1
60	male	49	60	3	0	0	III	5.19	3.02	1.64	0.42	0.1	0.01	228	145	44.1	30.4
42	male	49	42	3	3	0	IVb	5.28	3.52	1.22	0.43	0.1	0.01	193	139	40.3	38.8
38	male	60	60	3	2	0	III	11.83	7.01	3.43	0.83	0.5	0.06	290	145	39.1	35.4
60	male	37	60	3	2	0	III	4	1.77	1.71	0.37	0.13	0.02	136	153	41.1	33.1
60	male	54	60	3	1	0	III	6.93	4.81	1.65	0.38	0.06	0.04	197	140	45.4	31.8
60	male	37	60	3	2	0	III	6.43	2.77	3.13	0.37	0.15	0.01	309	140	45.2	28.1
7	male	25	0	2	3	0	IVb	6.08	3.17	2.24	0.43	0.23	0.01	258	156	48.4	39.7
60	male	26	60	3	2	0	III	6.27	3.27	2.33	0.61	0.05	0.01	161	158	51.1	32.2
60	male	46	60	3	3	0	IVb	7.39	4.03	2.48	0.73	0.12	0.04	278	152	39.4	38.7
47	male	47	47	3	3	0	IVb	7.33	5.62	1.18	0.46	0.07	0.01	236	153	43.2	31.4
60	male	25	60	3	2	0	III	9.19	6.66	1.65	0.62	0.25	0.01	325	149	46.3	33.2
	male	59		3	3	0	IVb	4.74	3.03	0.93	0.58	0.17	0.03	199	110	45.1	37.4
3	male	64	3	3	2	0	III	4.93	3.17	1.03	0.57	0.15	0.01	161	119	34.8	27.8
60	male	67	60	3	1	0	III	6.03	3.78	1.37	0.46	0.37	0.05	264	133	38.3	33
60	male	36	60	3	1	0	III	7.43	4.59	2.2	0.54	0.08	0.03	215	145	40.5	30.6
60	male	54	60	3	2	0	III	7.18	4.93	1.48	0.63	0.12	0.02	273	149	38.5	37.8
47	male	64	47	3	3	0	IVb	8.42	5.23	2.63	0.36	0.17	0.03	223	133	36.3	29.3
60	male	22	60	3	3	0	IVb	15.14	12.24	2.13	0.65	0.09	0.03	479	121	37.9	45.7
	male	54		3	3	0	IVb	4.54	2.53	1.53	0.37	0.1	0.02	225	154	42	32.8
58	male	46	58	3	2	0	III	4.9	2.96	1.33	0.43	0.15	0.03	236	140	40.1	32.8
16	male	44	16	3	3	0	IVb	7.67	4.37	2.31	0.8	0.15	0.04	201	176	43	37.9
60	male	46	60	3	2	0	III	8.75	15.9	5.1	0.8	0.07	0.03	203	151	45	33.1
60	male	48	60	3	1	0	III	5.38	3.07	1.75	0.41	0.12	0.03	163	150	41.3	24.2
8	male	37	8	3	3	0	IVb	6.99	4.51	1.42	0.86	0.19	0.01	214	134	33.1	27.1
57	male	41	57	3	3	0	IVb	6.38	4.23	1.28	0.41	0.45	0.01	320	138	45	32.4
60	male	41	60	3	2	0	III	5.39	3.24	1.42	0.33	0.39	0.01	174	145	43.3	24
60	male	28	60	3	1	0	III	5.65	2.93	2.05	0.49	0.16	0.02	150	138	44.2	34.5
	male	47		3	1	0	III	6.24	3.4	2.2	0.43	0.19	0.03	267	149	42.4	36
60	male	45	60	3	0	0	III	4.78	2.4	1.88	0.32	0.15	0.03	151	164	43	28.9
60	female	60	60	2	1	0	II	4.68	2.3	2.08	0.2	0.09	0.01	160	131	41.9	26
11	male	42	11	2	3	0	IVb	4.61	2.62	1.39	0.35	0.23	0.03	240	142	34	7.2
	female	52		2	2	0	III	7.37	4.27	2.44	0.57	0.09	0	260	127	41.8	36.8
60	male	30	60	2	2	0	III	4.8	2.51	1.64	0.51	0.13	0.01	158	137	33.6	33.6
60	male	46	60	2	1	0	II	4.51	3.05	0.98	0.41	0.07	0	139	137	38.7	29.3
60	female	39	60	2	3	0	IVb	5.71	3.59	1.53	0.4	0.16	0.03	199	131	39.1	25.9
60	female	42	60	2	3	0	IVb	3.09	1.79	0.96	0.26	0.06	0.02	201	121	38.8	39.4
60	female	44	60	2	3	0	IVb	4.06	1.84	1.76	0.4	0.04	0.02	189	130	38	29.4
60	female	51	60	2	3	0	IVb	5.67	2.95	2.22	0.44	0.05	0.01	195	113	42.5	32.2
36	female	57	36	2	2	0	III	5.02	2.04	2.08	0.73	0.15	0.03	60.1	120	31.4	55.6
60	male	55	60	2	0	0	II	3.82	2.55	0.85	0.38	0.04	0	132	152	44	27.6
60	male	54	60	2	3	0	IVb	5.57	3.18	1.7	0.44	0.24	0.01	85	138	41.3	30.1
14	male	59		2	2	0	III	6.22	4.21	1.62	0.34	0.5	0.02	121	164	45.4	28
60	male	44	60	2	2	0	III	5.4	3.35	1.46	0.5	0.08	0.01	109	146	42.1	25.1
60	male	32	60	2	1	0	II	3.25	1.73	1.13	0.3	0.08	0.01	88	141	40.6	23.9
60	female	39	60	2	2	0	III	6.07	3.87	1.66	0.41	0.07	0.06	188	111	39.2	27.5
60	female	50	60	2	2	0	III	3.25	1.56	1.29	0.32	0.07	0.01	238	129	41.3	29.2
13	male	48	13	2	3	0	IVb	7.01	4.26	2.03	0.44	0.23	0.05	256	154	44.3	36
32	male	72	32	2	2	0	III	7.06	4.39	1.91	0.66	0.07	0.03	250	144	42.3	31.7
60	male	71	60	2	3	0	IVb	3.42	1.62	1.25	0.36	0.17	0.2	93.6	143	36	26.1
60	female	59	60	2	2	0	III	5.23	3.31	1.59	0.25	0.07	0.01	344	124	45.8	30.7
60	female	39	60	2	2	0	III	3.56	2.01	1.07	0.45	0.02	0.01	227	91.4	42.9	30.3
60	male	44	60	2	3	0	IVb	7.48	4.78	2.12	0.46	0.04	0.07	161	163	40.6	25.4
43	male	55	43	2	3	0	IVb	8.71	5.77	1.68	0.77	0.43	0.06	315	137	32.6	43.3
60	male	44	60	2	3	0	IVb	4.66	2.55	1.31	0.45	0.34	0.01	243	143	45	32.8
34	male	43	34	2	2	0	III	6.07	2.67	2.45	0.8	0.13	0.01	245	135	43.4	38
60	male	49	60	2	1	0	II	5.11	2.79	1.58	0.37	0.35	0.03	184	160	40.3	27.8
60	male	53	60	2	2	0	III	8.68	5.42	2.42	0.61	0.2	0.03	204	140	41.9	25.7
60	male	62	60	2	2	0	III	8.24	7.14	0.79	0.31	0.01	0	276	145	41	40.9
60	male	47	60	2	2	0	III	5.24	2.22	2.27	0.51	0.23	0.01	216	119	41.7	39.1
60	male	62	60	2	1	0	II	5.21	3.32	1.58	0.24	0.05	0.02	198	151	43.1	29
23	male	40	23	2	3	0	IVb	5.8	3.46	1.79	0.51	0.02	0.01	301	160	42	31.4
60	male	49	60	2	0	0	II	4.59	2.87	1.26	0.33	0.1	0.02	198	148	41.6	28.9
60	male	42	60	2	1	0	II	4.27	1.44	2.15	0.56	0.11	0.01	280	147	40	29.8
60	male	46	60	2	2	0	III	3.79	1.74	1.62	0.25	0.16	0.02	178	136	38.1	30.1
60	male	46	60	2	1	0	II	3.91	1.88	1.5	0.31	0.19	0.03	180	132	43.9	26
60	male	60	60	2	2	0	III	4.31	2	1.56	0.42	0.32	0.01	138	132	36	34.4
60	male	49	60	2	2	0	III	3.99	2.14	1.49	0.32	0.03	0.01	180	130	39.6	30.2
60	male	43	60	2	0	0	II	6.04	2.43	2.81	0.46	0.29	0.05	199	143	42.1	28.7
60	male	40	60	2	1	0	II	7.7	3.63	3.37	0.53	0.16	0.01	198	148	43	29.6
60	male	46	60	2	1	0	II	6.35	3.7	2.02	0.28	0.33	0.02	130	151	42.8	28.1
60	male	39	60	2	2	0	III	6.36	3.82	1.95	0.43	0.15	0.01	204	165	47.6	28.9
60	male	50	60	2	3	0	IVb	9.06	4.2	6.16	0.43	0.24	0.03	181	149	41.9	28.5
	male	20		2	2	0	III	8.22	4.53	2.99	0.51	0.18	0.01	326	144	40.9	30.7
60	male	32	60	2	2	0	III	9.94	8.31	1.38	0.23	0.01	0.01	157	152	45	28.6
60	male	35	60	2	2	0	III	6.08	3.31	2.17	0.5	0.08	0.01	145	154	43.3	28.2
60	male	24	60	2	2	0	III	6.36	3.48	2.25	0.48	0.15	0	242	160	45.7	30.5
60	male	52	60	2	2	0	III	7.39	5.1	1.69	0.5	0.07	0.03	180	139	38.9	26.2
60	male	39	60	2	2	0	III	8.41	6.38	1.25	0.69	0.07	0.02	191	134	32.1	28.6
5	male	60	5	2	3	0	IVb	5.35	3.98	0.86	0.38	0.12	0.01	198	139	41.6	34.1
60	male	39	60	2	3	0	IVb	7.79	5.38	1.87	0.44	0.07	0.04	222	159	41.3	32.4
60	male	50	60	2	2	0	III	8.93	6.42	1.79	0.54	0.17	0.02	329	137	40.6	31.4
60	male	51	60	2	3	0	IVb	5.43	3.13	1.95	0.33	0.01	0.01	167	165	46.7	31.9
60	male	43	60	2	2	0	III	7.68	5.1	1.74	0.6	0.21	0.03	141	143	38	25.9
60	male	35	60	2	2	0	III	5.32	3.24	1.7	0.23	0.14	0.01	99	163	41.9	28.4
60	male	25	60	2	1	0	II	7.12	4.29	2.17	0.56	0.1	0	245	162	49.7	32.9
60	female	44	60	2	1	0	II	8.11	5.35	2.15	0.51	0.08	0.02	211	140	47.3	33.3
60	male	26	60	2	0	0	II	6.27	3.27	2.33	0.61	0.05	0.01	161	158	51.1	32.7
60	female	49	60	1	1	0	II	3.65	2.29	0.99	0.29	0.07	0.01	175	114	39.1	29
60	female	54	60	1	1	0	II	4.74	2.63	1.66	0.32	0.09	0.04	326	132	44.3	28.3
60	male	35	60	1	3	0	IVb	6.16	4.15	1.46	0.42	0.1	0.03	238	134	48.4	33.1
60	male	41	60	1	2	0	III	7.3	3.65	3.17	0.34	0.11	0.03	252	157	49.6	32.1
60	male	31	60	1	2	0	III	6.95	3.4	2.72	0.73	0.07	0.03	179	170	39.8	29.7
2	male	38	2	1	3	0	IVb	6.99	4.51	1.42	0.86	0.19	0.01	214	134	33.1	27.1
60	male	44	60	1	2	0	III	4.91	2.55	1.98	0.32	0.05	0.01	240	162	43.2	27.7
44	male	68	44	1	3	0	IVb	7.3	5.02	1.32	0.61	0.34	0.01	259	140	36.7	36.6
60	male	55	60	1	3	0	IVb	8.15	5.37	1.94	0.66	0.13	0.05	135	157	40.6	26.4
60	male	50	60	1	1	0	II	4.93	2.48	1.49	0.63	0.26	0.07	214	136	43.2	28
60	male	39	60	1	2	0	III	6.58	4.04	1.77	0.52	0.22	0.03	205	152	42.3	31.7
	male	49		1	2	0	III	3.23	1.09	1.63	0.38	0.12	0.01	194	145	42.2	34.3
	male	50		1	3	0	IVb	5.1	2.4	1.73	0.81	0.1	0.07	177	140	37.6	26.1
60	male	41	60	1	1	0	II	5.99	3.39	1.79	0.33	0.45	0.03	174	152	42.7	30.2
44	male	48	44	1	2	0	III	7.16	4.19	2.35	0.47	0.12	0.04	186	149	42.8	29.8
	male	50		1	3	0	IVb	6.39	3.97	1.89	0.45	0.05	0.03	304	143	42.7	32
52	female	45	52	1	0	0	I	3.79	1.62	1.69	0.35	0.11	0.03	177	122	40.1	26.8
60	female	29	60	0	2	0	III	6.03	3.98	1.44	0.54	0.07	0	242	133	42.8	33.9
